1 **Microbiome structure of a wild *Drosophila* community along tropical**  
2 **elevational gradients and comparison to laboratory lines**

3

4 **Joel J. Brown**<sup>\* 1, 2, 3</sup>, **Anna Jandová**<sup>3</sup>, **Christopher T. Jeffs**<sup>4</sup>, **Megan Higgin**<sup>5</sup>, **Eva Nováková**<sup>2, 6</sup>,  
5 **Owen T. Lewis**<sup>4</sup> & **Jan Hřček**<sup>2, 3</sup>

6 <sup>1</sup> Cornell University, Department of Entomology, Ithaca, New York, USA (current address)

7 <sup>2</sup> University of South Bohemia, Faculty of Science, České Budějovice, Czech Republic

8 <sup>3</sup> Institute of Entomology, Biology Centre of the Czech Academy of Sciences, České Budějovice, Czech Republic

9 <sup>4</sup> Department of Zoology, University of Oxford, Oxford, U.K.

10 <sup>5</sup> College of Science & Engineering, James Cook University, Townsville, QLD, Australia

11 <sup>6</sup> Institute of Parasitology, Biology Centre of the Czech Academy of Sciences, České Budějovice, Czech Republic

12 \* Corresponding author: joeljbrown15@gmail.com

13

14 **Statement of authorship:** JJB, CTJ, MH, OTL, JH designed the research. CTJ and OTL executed  
15 the fieldwork. JJB, AJ, EN performed the molecular work. JJB analysed the data. JJB wrote the  
16 first version of the manuscript. All authors contributed to the improvement of the manuscript.

17 **Conflict of interest:** The authors declare no conflict of interest.

18 **Running title:** Microbiome along elevation and wild vs lab

19 **Keywords:** Bacteria; community; *Drosophila*; ecology; elevation gradient; field and  
20 laboratory; metabarcoding; microbiome; symbiosis

- 21 **Abstract count: 233 words**
- 22 **Main text count: 5178 words**
- 23 **Number of references: 80**
- 24 **Number of figures, tables, and text boxes: 4**

25 **Abstract**

26 While the biogeography of free-living microbial communities is well-studied, community  
27 turnover along environmental gradients in host-associated communities is not well  
28 understood. In particular, patterns of host-microbiome diversity along elevational gradients  
29 remain largely uncharacterized. Because elevational gradients may serve as natural proxies  
30 for climate change, understanding these temperature-influenced patterns can inform our  
31 understanding of the threats facing hosts and their microbes in a warming world. In this study,  
32 we analysed microbiomes from pupae & adults of four *Drosophila* species native to Australian  
33 tropical rainforests. We sampled wild individuals at high and low elevation along two  
34 mountain gradients, to determine natural diversity patterns, and sampled laboratory-reared  
35 individuals from isofemale lines established from the same localities, to see if any natural  
36 patterns would be retained in the lab. In both environments, we controlled for diet to help  
37 elucidate other deterministic patterns of microbiome composition. Microbiome community  
38 composition differed radically between laboratory-reared and field-caught flies but did not  
39 significantly differ across elevation. We found some notable taxonomic differences in  
40 *Drosophila* microbiomes between different species and elevations. We also found similar  
41 microbiome composition from both types of provided food, and we therefore suggest the  
42 significant differences in richness are the products of environments with different bacterial  
43 species pools. We conclude that elevational differences in temperature are not a major factor  
44 in determining *Drosophila* microbiome composition and we caution against determining  
45 microbiome composition from lab-only specimens, particularly long-term cultures.

46

47 **Importance**

48 Bacteria form microbiome communities inside many different hosts. These communities vary  
49 widely in diversity, and form differently, depending on a wide variety of factors. Diet is often  
50 an important factor for microbiome composition. We controlled diet in our study by providing  
51 the same food sources. We looked at how host-microbiome communities differed in four  
52 *Drosophila* species over two mountain gradients in tropical Australia, to see if temperature-  
53 driven differences in elevation affected host-microbiomes. We also compared these results  
54 to individuals kept in the laboratory to understand how different settings changed  
55 microbiome communities. We found that field samples had substantially greater microbiome  
56 diversity than those from the lab and found minimal differences in microbiome communities  
57 over elevation. Our study shows that environmental sources of bacteria matter for *Drosophila*  
58 microbiome composition, and caution should be exercised when interpreting microbiome  
59 results from lab-only studies.

60

## 61 **Introduction**

62 Patterns of diversity over environmental gradients like latitude, elevation, or environmental  
63 degradation have long been of interest in community ecology and are of renewed interest for  
64 studying the potential consequences of climate change (Fierer et al., 2011; Wang et al., 2011;  
65 Pärtel et al., 2016; Thompson et al., 2017). Most studies have focused on animals and plants  
66 to investigate these patterns, but bacterial communities are receiving increased attention.  
67 Some studies suggest free-living bacteria do not follow the same broad biogeographic  
68 patterns as plants and animals (Fierer and Jackson, 2006; Lauber et al., 2009; Meyer et al.,  
69 2018). Fierer et al. (2011) showed that soil bacteria did not change significantly in diversity  
70 when sampled across an elevational gradient, in contrast to trends documented in most other  
71 taxa. Subsequent studies have found inconsistent patterns in bacterial communities sampled

72 from streams and soils across elevational gradients, with differences usually being attributed  
73 to changes in pH and C:N ratio (Wang et al., 2011; Shen et al., 2015; Siles and Margesin, 2016;  
74 Meyer et al., 2018).

75

76 Many insects maintain intimate communities of symbiotic microbes (their 'microbiome').  
77 Insect microbiomes can play important roles in host health, digestion, thermal regulation, and  
78 protection against natural enemies (reviewed in McLean et al., 2016; Corbin et al., 2017;  
79 Brown et al., 2020a). In turn, many factors can influence insect microbiome composition,  
80 some host-associated (e.g. diet, insect species identity, ontogeny, and parent-to-offspring  
81 transmission), others abiotic (e.g. local environment and temperature) (Colman et al., 2012;  
82 Yun et al., 2014; Xie et al., 2015; Martinson et al., 2017; Nováková et al., 2017; Bing et al.,  
83 2018; Park et al., 2019; Brown et al., 2020b). Symbioses between insects and bacteria have  
84 been particularly well investigated (Douglas, 2016), notably because their microbiome  
85 communities tend to be less complex than those of vertebrates (Woodhams et al., 2020).  
86 However, in contrast to environmental microbial communities, the effect of elevational  
87 change on insect-associated microbiome communities has yet to be investigated in-depth.  
88 The most conspicuous aspect of a change in elevation is a difference in mean temperature,  
89 creating different abiotic environments that can be used as a proxy for climate change  
90 scenarios (Wadgymar et al., 2018; Nottingham et al., 2019). We would expect to see  
91 differences in microbiome composition because development is temperature-dependent in  
92 both insects (Economos and Lints, 1984; James et al., 1997; Kinjo et al., 2014; Tochen et al.,  
93 2014; Brankatschk et al., 2018) and bacteria (Ratkowsky et al., 1982; Pettersson and Bååth,  
94 2003; Tsuji et al., 2017). Thus, at different elevations and in climate change scenarios, insect-  
95 associated microbiomes could develop differently.

96

97 Many microbiome studies have been performed on lab-reared organisms, and many studies  
98 have sampled organisms from the field, but few have done both. Some studies suggest that  
99 microbiome richness is not appreciably different between the lab and the field (Hegde et al.,  
100 2018), whilst others find that captive animals have significantly reduced microbiome richness,  
101 and significantly altered taxonomic composition, compared to wild animals (Morrow et al.,  
102 2015; Bost et al., 2018a; Hegde et al., 2018; Dada et al., 2020). Model organisms such as mice,  
103 *Drosophila melanogaster*, and mosquitoes have had their microbiomes sequenced as part of  
104 laboratory studies. The main conclusion from most of these studies is that microbiomes are  
105 very different in lab-reared individuals, for a variety of reasons, but primarily because the  
106 colonising bacterial species pool is heavily reduced in laboratory housing, zoos, or wildlife  
107 parks (Amato et al., 2013; Nelson et al., 2013; Hammer et al., 2014; Kohl et al., 2014; Clayton  
108 et al., 2016; Staudacher et al., 2016; Adair et al., 2020; Dada et al., 2020). For many free-  
109 ranging animal species, lab vs field comparisons are not feasible due to the difficulty of  
110 bringing wild animals into a laboratory, but insects offer a tractable model system to directly  
111 compare lab and field microbiotas from the same host species.

112

113 *Drosophila* spp. are established models for studying insect-associated microbiomes (Chandler  
114 et al., 2011; Blum et al., 2013; Wong et al., 2013; Chaplinska et al., 2016; Adair et al., 2018,  
115 2020) because they are naturally abundant and easy to maintain in laboratory cultures.  
116 *Drosophila*-associated microbiomes have important functional impacts on many aspects of  
117 their ecology including development (Elgart et al., 2016), ability to recognise kin (Lizé et al.,  
118 2014), thermal tolerance (Henry and Colinet, 2018), and immunity (Sansone et al., 2015;  
119 Chaplinska et al., 2016). Additionally, some *Drosophila* species possess intracellular

120 endosymbionts (*Wolbachia* and *Spiroplasma*) that influence host immunity and protect  
121 against natural enemies, including pathogenic fungi, nematodes, and parasitoids (Chrostek et  
122 al., 2013; Hamilton and Perlman, 2013; Haselkorn et al., 2013; Xie et al., 2014; Yadav et al.,  
123 2018). *Drosophila* bacterial microbiomes are of moderate-to-low diversity, making them  
124 relatively simple to characterise. This, combined with the well-studied nature of *Drosophila*,  
125 makes them ideal candidates for investigating insect-associated microbiomes over  
126 elevational gradients, and in a field vs laboratory setting.

127

128 Here we present one of the first analyses examining the effects of elevation-induced  
129 temperature change on insect microbiome composition. This study was specifically designed  
130 to find key deterministic factors shaping microbiome composition and to establish if there  
131 was any consistency in deterministic patterns in the microbiomes of lab-bred individuals of  
132 from four focal species of frugivorous *Drosophila* from two mountain gradients in tropical  
133 Australia - *Drosophila rubida*, *D. pseudoananassae*, *D. pallidifrons*, and *D. sulfurigaster*. These  
134 species occur throughout north Queensland, including along multiple altitudinal gradients in  
135 the Wet Tropics. We chose these four species because they occur in sympatry across the full  
136 elevational gradient at our chosen sites (Jeffs et al., 2021). We hypothesised that we would  
137 see a difference in microbiome composition between high and low elevation populations  
138 because of the differences in temperature at these sites. To reinforce our investigation, we  
139 sampled microbiomes from lab-reared flies of the same species which were collected from  
140 the same field sites, to see if fly microbiomes retained any species- and site-specific  
141 differences. To control for diet we exclusively sampled pupae from banana-baited bottle traps  
142 (see Jeffs et al., 2021), thus guaranteeing that each individual sample originated from an egg  
143 laid in our bottle traps and therefore fed solely on yeasted banana. We expected *a priori* to

144 find high among-individual variation and hypothesised that species identity, elevation, and  
145 environment (i.e. lab vs field) would be the primary causes of difference in host microbiome  
146 community composition (Chandler et al., 2011; Staubach et al., 2013; Adair et al., 2018, 2020).

147

## 148 **2. Material & Methods**

### 149 *2.1 Study Sites*

150 The Australian Wet Tropics World Heritage Area (WTWHA) is a 450 km long, narrow section  
151 of rainforest along Queensland's northeast coast between Cooktown and Townsville (15-19'S,  
152 145-146.30'E). Samples were collected from two altitudinal gradients: Paluma Range Road  
153 (within Paluma Range National Park 19°00'S, 146°14'E) and Kirrama Range Road (within  
154 Girramay National Park 18°12'S, 145°50'E). The Paluma gradient ranges from 59 m to 916 m  
155 above sea level (a.s.l.) and the Kirrama gradient ranges from 92 m to 770 m a.s.l (Jeffer et al.,  
156 2021). We chose sites at high, middle, and low elevations (Paluma: 880m, 350m, 70m;  
157 Kirrama: 730m, 390m, 70m) to capture a ~5°C temperature range (mean temperatures 21°C  
158 at high elevation, 26°C at low elevation; Jeffer et al., 2021).

159

### 160 *2.2 Sample Collection and Selection*

161 To ensure a sufficiently comparable dataset, we selected stratified subsets of samples from  
162 the field and laboratory. We primarily collected pupae because they are a sessile and long-  
163 lasting life stage, allowing us to account for discrepancies in development rate between  
164 species. We also collected a small number of adult flies to compare microbiome composition  
165 between life stages. Based on the results of Jeffer et al., (2021) which identified the wild  
166 *Drosophila*-parasitoid food web to species level with COI metabarcoding and Multiplex PCR



167 methods, we selected 214 field samples of the four most common species (to control for  
168 species identity) that occurred at all elevations along both transects: *D. rubida*, *D.*  
169 *pseudoananassae*, *D. pallidifrons*, and *D. sulfurigaster*. Eight individuals of *D. rubida* were  
170 parasitised, enabling us to examine if there are any changes in microbiome richness or unique  
171 microbial taxa associated with a developing parasitoid. We subsequently sampled 70 pupae  
172 and 70 adults from isofemale laboratory lines (2-4 per species) of these four elevationally  
173 ubiquitous species (20 pupae and 20 adults from *D. sulfurigaster*, *D. rubida*, and *D.*  
174 *pseudoananassae*, and 10 pupae and 10 adults from *D. pallidifrons*) to investigate if suspected  
175 natural patterns (site- and species-specific influence) were retained in lab-reared flies. We  
176 additionally took 10 samples of the food source used in keeping lab-reared *Drosophila* and 20  
177 samples of the banana bait we used in our field sampling, to ensure we could compare  
178 *Drosophila* microbiome samples to a dietary reference and determine how controlling for diet  
179 influenced our *Drosophila* microbiome communities.

180

181 Samples of *Drosophila* pupae were collected from banana-baited bottle traps placed at low,  
182 middle, and high elevation sites along both altitudinal gradients. Each bottle trap had a piece  
183 of cardboard to assist *Drosophila* larvae in pupation. Bottle traps were exposed for either 11-  
184 12, 14-15, or 24 days, to capture the natural variation in community colonisation and variation  
185 in ontogenetic development in different *Drosophila* species (Jefferies et al., 2021). On the day of  
186 sampling, these cards were removed and sealed in Ziploc® bags. The pupae we collected had  
187 only fed on banana bait. Pupae from each card were sampled by placing the card on a white  
188 plastic dinner plate and adding distilled water, using a small paintbrush to remove all pupae.  
189 Each individual pupa was placed into an individual well in 96-well PCR plates and preserved  
190 in 100% ethanol. Adults were collected using an aspirator, 2 days after provision of fresh

191 banana bait and placed into individual vials in 100% ethanol. Laboratory-reared pupae were  
192 collected with forceps from standard fly food. Adults were collected with an aspirator and  
193 sexed, then placed in individual vials with 100% ethanol. Laboratory isofemale lines were  
194 established from the same populations sampled in the field (i.e., they were collected at the  
195 same sites and shipped live to the lab in Czech Republic, one year after collection of the field  
196 samples used in this experiment). Isofemale lines were kept in the lab for between 18-30  
197 months by the time of sampling. Complete sample breakdown is shown in Table 1.

198

### 199 *2.3 Library Preparation & Sequencing*

200 Field sample DNA was extracted using GeneAid Blood and Tissue kits for host-parasitoid  
201 identification (published in Jeffs et al., 2021). Lab and bait samples were extracted using the  
202 same single column method according to manufacturer instructions, with one extraction  
203 negative control accompanying every 29 samples. All samples were subsequently moved to  
204 96-well plates in a randomised order. DNA templates were stored at -75°C. These templates  
205 were used for amplification of ~400 bp of the V4/V5 hypervariable region of the 16S rRNA  
206 gene according to Earth Microbiome Project standards (EMP;  
207 <http://www.earthmicrobiome.org/protocols-and-standards/16s/>). Sample multiplexing was  
208 based on the EMP-proposed double barcoding strategy using the recommended  
209 modifications (12 bp Golay barcodes included on the forward primer 515F, and additional 5  
210 bp barcodes on the reverse primer 926R). We also added a custom 18S rRNA gene blocking  
211 primer (named 926X) to counteract the low specificity of EMP primers towards the 16S rRNA  
212 gene (details in Brown et al., 2020b). PCR amplification was confirmed with gel  
213 electrophoresis. PCR products were purified with AMPure XP (Beckman Coulter) magnetic  
214 beads, pooled to equimolar concentration (based on DNA concentration measured using a

215 Synergy H1 (BioTek) spectrophotometer), then cleaned again using Pippin Prep (Sage Science)  
216 to eliminate all fragments outside the 300-1100 bp range. To confirm barcoding success, we  
217 included four negative controls from the extraction procedure (ENC), eight negative controls  
218 from the PCR process (NC), and eight positive controls (PC) of mock microbiome communities.  
219 PCs were supplied commercially and comprised 4 samples of gDNA templates with equal  
220 abundance of 10 bacterial species (ATCC® MSA-1000™) and 4 samples with staggered  
221 abundance for the same bacteria (ATCC® MSA-1001™). The library comprised four plates of  
222 samples. In each sequencing plate there was one ENC, two NCs, and two PCs - one even mock  
223 community and one staggered mock community. The library was sequenced by a single run  
224 of the Illumina MiSeq platform using v3 chemistry with 2 x 300 bp output (Norwegian High  
225 Throughput Sequencing Centre, Department of Medical Genetics, Oslo University Hospital).

226

#### 227 *2.4 Data Processing and Statistical Analyses*

228 The sequencing process returned 15,893,914 reads. These raw reads were quality checked  
229 (FastQC; Andrews, 2010) and trimmed using USEARCH v9.2.64 (Edgar, 2013), to keep the  
230 quality score above Q20. We trimmed the primers, demultiplexed and merged the reads  
231 which resulted in a final amplicon length of 357 bp. We then clustered the reads at 100%  
232 identity for a representative set of sequences and used the USEARCH global alignment option  
233 at both 99% and 97% identity (Edgar, 2013) for *de novo* OTU assignment. We subsequently  
234 used the BLAST algorithm (Camacho et al., 2009) on the representative sequences, matching  
235 them against the SILVA 132 database (Quast et al., 2013) for taxonomic identification,  
236 producing a dataset of 1132 OTUs at 97% identity and 1118 at 99% identity. We used the 97%  
237 identity OTU table as the primary dataset and used the 99% identity table as a supplemental

238 dataset to confirm that the patterns we found were not a product of identity threshold (e.g.,  
239 Fig. S8).

240

241 Any chloroplast, mitochondrial or eukaryotic OTUs were identified in the OTU table and  
242 excluded. Potential bacterial contaminants were systematically identified by examining the  
243 prevalence of reads found in negative controls using the R package 'decontam' (V1.5.0; Davis  
244 et al., 2018). Specifically, OTUs with a higher proportion of reads in negative controls than in  
245 actual samples were labelled as contaminants and excluded (Fig. S2). 43 OTUs were  
246 eliminated from the dataset via this process. Singletons were also excluded. We set the  
247 minimum threshold of positive detection of OTUs in a sample to 2000 reads, because all the  
248 negative controls had a total number of reads beneath this number. This excluded 38  
249 individual samples. We then subsampled to a fixed minimum depth of 2000 reads without  
250 replacement across samples and agglomerated the OTUs at the Genus level, to standardize  
251 the dataset for diversity analyses. These procedures resulted in a dataset of 117 OTUs and  
252 343 samples. We used Shannon index and Bray-Curtis dissimilarity as quantitative measures  
253 of alpha and beta diversity, respectively, and calculated ordination analyses (non-metric  
254 multidimensional scaling; NMDS) with PERMANOVA tests to determine significant community  
255 differences, using the packages 'vegan' (Oksanen et al., 2019) and 'phyloseq' (McMurdie and  
256 Holmes, 2013) in R (R Core Team, 2019).

257

258 With negative controls removed from the data, we had a mean of 16,898 reads per sample  
259 and a median of 14,751 reads. From our positive controls, we recovered microbiome profiles  
260 that matched the expected community composition in each of the 'staggered' and 'even'

261 mock communities. In the staggered mocks, there were two species present at 0.04% and our  
262 sequencing detected reads of those species in all four staggered mock samples. In the even  
263 mocks, there was consistent overrepresentation of *Clostridium beijerinckii* and *Escherichia*  
264 *coli* (1.4x - 4.7x expected), leading to subsequent reductions in other taxa. Overall, the  
265 positive controls in this sequencing run matched our previous sequence outcomes  
266 (Rodríguez-Ruano et al., 2018; Brown et al., 2020b).

267

### 268 **3. Results**

#### 269 *3.1 Microbiomes across elevation*

270 Elevation had a small but significant effect (NMDS ordination, mean stress  $\approx$  0.22,  
271 PERMANOVA,  $R^2 = 0.067$ ,  $p \leq 0.001$ ; Fig. S4) when comparing pupae samples from the  
272 different field sites, suggesting that differences in temperature and geographic location  
273 (because of elevation) and gradient location have a minor effect on *Drosophila* microbiome  
274 composition.

275

#### 276 *3.2 Microbiome and environment of origin*

277 The dominant trend in our results was a significant reduction in microbiome richness in lab-  
278 reared flies of all species, compared to those from the field, based on ANOVA tests between  
279 Shannon index values (Fig. 1). We found this significant trend in both pupae and adult  
280 *Drosophila* (Fig. S5/S6). In multivariate analyses (NMDS), environment of origin was the  
281 dominant explanatory factor for microbiome community composition, with consistent  
282 significant differences between pupae sampled from the lab and the field (Fig. 2, Fig. S4).  
283 These differences were observed for all species, but were particularly obvious for *D. rubida*,

284 our most sampled species (Fig. 2, mean stress  $\approx 0.15$ ; PERMANOVA  $R^2 = 0.299$ ,  $p \leq 0.001$ , with  
285 significant Beta-dispersion  $F = 242.71$ ,  $p \leq 0.001$  on 999 permutations). In the more diverse  
286 field samples, the dominant genera were *Acinetobacter*, *Klebsiella*, and *Providencia*. The  
287 dominant bacteria genera in lab-sampled microbiomes were *Acetobacter*, *Gluconobacter*, and  
288 *Lactobacillus*, with *D. pseudoananassae* maintaining the endosymbiont *Wolbachia* (Fig. S1).

289

### 290 3.3 Species-specificity

291 We found some evidence of species-specific differences amongst pupae from the field  
292 (PERMANOVA  $R^2 = 0.077$ ,  $p \leq 0.001$ ). These minor differences in community composition can  
293 be recognised on sample microbiome profiles (Fig. 3), for example, *D. rubida* did not contain  
294 any *Acetobacter* whereas the other three species did. Microbiome communities are mostly  
295 similar between species, with *D. rubida*, *D. pseudoananassae*, *D. sulfurigaster*, and *D.*  
296 *pallidifrons* all primarily composed of *Acinetobacter*, *Klebsiella*, *Providencia*, and  
297 *Pseudomonas* (four of the five most abundant bacterial genera in this dataset). *D. rubida*  
298 microbiomes had a much greater relative abundance of *Providencia* than the other three  
299 species. The other dominant bacterial genera were evenly distributed throughout all four  
300 *Drosophila* species sampled here, including *Acinetobacter*, which was the most dominant  
301 genus overall. Fig. 3 shows that *D. rubida* microbiomes contain a greater proportion of 'other'  
302 taxa, i.e., bacterial genera not in the top 20 for relative abundance, suggesting greater  
303 intraspecific variation in microbiome composition. There was no detectable difference in  
304 microbiome diversity of parasitised pupae of *D. rubida*, compared to unparasitized pupae, nor  
305 was there any notable change in the abundance of dominant bacteria. Examination of  
306 microbiome composition indicated that there were no bacterial genera unique to parasitised  
307 samples.

308

309 In contrast to the field, there was much stronger species-specificity in the lab-reared samples  
310 (PERMANOVA  $R^2 = 0.292$ ,  $p \leq 0.001$ ). *D. rubida* contained a much higher proportion of  
311 *Corynebacterium* and *Providencia* in their microbiomes, compared to any of the other species.  
312 *D. pseudoananassae* was the only species to contain *Wolbachia*, which made up a significant  
313 proportion of the reads in many individuals. Additionally, *D. pallidifrons* was the only species  
314 to contain *Weissella* (Fig. S1).

315

#### 316 3.4. Microbiome and other factors

317 In the field we exposed baits for different durations to ensure we characterized the insect  
318 community fully. The field sample results suggest that this had minimal influence on  
319 microbiome composition, in comparison to the dominant patterns we identified (3% variation  
320 explained by length of exposure vs 7% or more by other factors). In the lab, the number of  
321 generations a fly line had been in the lab was not significant when tested with alpha diversity  
322 metrics but was a significant factor in NMDS analysis. Yet it only explained 1.5% variation and  
323 there was no discernible difference in bacterial genera composition. Surprisingly, there was  
324 no significant difference in microbiome composition of laboratory food samples from Czech  
325 Republic and the banana bait that we used in the field in Australia. Both are completely  
326 dominated by *Acetobacter* and *Lactobacillus*, with some lab food samples containing  
327 *Gluconobacter* (Fig. S7). In lab-reared flies, these 3 genera dominated the microbiomes of  
328 pupae and adults (Fig. S1). In the field, however, *Acetobacter* and *Lactobacillus* were not the  
329 most dominant genera. There was still some congruence because these taxa were still present

330 at high relative abundance, but their relative abundance was proportionally lower because  
331 field-caught fly microbiomes were much richer.

332

### 333 **Discussion**

334 We examined *Drosophila* microbiome community-level patterns across multiple elevations,  
335 species, environments, and life stages. We specifically focused on elevation as a potential  
336 factor influencing microbiome composition, due to the lack of prior investigation and the  
337 natural variation in temperature that elevation gradients provide. Our results reveal  
338 significant differences in community dissimilarity between high and low elevation across both  
339 gradients but these differences are small, based on the amount of variation explained by  
340 PERMANOVA tests. This finding is likely a result of the species sampled here being ubiquitous  
341 across elevation and not forming sufficiently distinct populations at high and low sites, and  
342 because the ~5°C temperature shift between our sites is not strong enough to drastically alter  
343 microbiome composition. This result was unexpected, because there is well-documented  
344 evidence of both insects and bacteria developing differently according to differences in  
345 temperature of this magnitude (Pettersson and Bååth, 2003; Kinjo et al., 2014; Tochen et al.,  
346 2014; Tsuji et al., 2017; Brankatschk et al., 2018; Cooper et al., 2021). Despite previous studies  
347 demonstrating a lack of change in bacterial diversity across elevation (Fierer et al., 2011;  
348 Wang et al., 2011), we expected to find a difference in *Drosophila*-associated microbiomes  
349 because an insect's internal environment is very different from soil or streams. Naturally, diet  
350 might differ along an elevational gradient based on the fruits that develop in different  
351 environments. By standardising diet, we showed that changes can be expected in different  
352 *Drosophila* species due to non-dietary forces. Furthermore, the high disparity in microbiome  
353 composition between banana bait samples and field-reared pupae suggests that diet is not



354 always the most important variable structuring *Drosophila* microbiomes, either. By  
355 standardising diet, we expected some diet-induced homogenisation to occur in *Drosophila*  
356 microbiomes. Instead, we found an overall lack of congruence. From a broad perspective,  
357 changing global temperatures may not result in large changes to insect-associated  
358 microbiomes, at least in insects like *Drosophila*.

359

360 The most pronounced differences in microbiome composition were between individuals  
361 raised in the laboratory and those raised in the field. Multiple factors coalesce to explain this  
362 distinction. Firstly, lab and field individuals were exposed to agar-yeast fly food medium and  
363 banana, respectively, thus their dietary sources were different. However, the food sources  
364 themselves have very similar microbiome profiles, suggesting the dietary source had little  
365 influence. The bacterial community from lab food matches well with the microbiomes found  
366 within pupae and adult flies. This would be expected, because it shows a well-established  
367 pathway of insect microbiome colonisation - they ingest food and acquire the bacteria  
368 associated with that food source. Yet in the field, fly microbiomes do not correspond well  
369 with the bacterial communities found on banana bait samples, the microbiomes are much  
370 richer in the field. We can therefore infer that the differences are mostly due to significant  
371 differences in microbiome colonisation from environmental bacterial species pools (Cornell  
372 and Harrison, 2014; Kohl, 2020). The flies sampled from the lab come from a highly regulated  
373 environment, with a specific and consistent food source provided into heat-sterilised glass  
374 vials, so the only 'available' bacteria for colonising their microbiomes comes from the food  
375 and vertically inherited bacteria (e.g., *Wolbachia* in *D. pseudoananassae*). In contrast, the  
376 bacterial species pool in Australian tropical rainforest comprises much greater diversity and  
377 abundance of different bacteria, creating a greater variety of possible microbiome

378 communities within *Drosophila* hosts. This diversity of taxa creates more room for ecological  
379 drift, dispersal, and selection to act on microbiome communities, in turn creating greater  
380 among-individual and between-species variation in wild flies. We found consistent diversity  
381 in wild *Drosophila* microbiomes - suggesting that bacteria are not being selectively removed  
382 from communities and that low-biomass microbiomes are predominantly colonised from the  
383 wider environment. Bottle traps were visited by other organisms, which could have  
384 functioned as a source of bacteria indirectly transmitted to the *Drosophila* sampled in this  
385 study.

386

387 There was high congruence between the microbiome communities in lab-reared pupae and  
388 lab-reared adults, suggesting that low diversity within pupae is an accurate representation of  
389 lab-reared microbiomes. This ontogenetic congruence implies that other life stages (eggs,  
390 larvae) would likely have similar microbiomes too. The result was surprising because we  
391 anticipated some stage-specific microbiome community patterns, given that *Drosophila* are  
392 holometabolous insects and thus undergo substantial gut remodelling during complete  
393 metamorphosis (Hammer and Moran, 2019). The consistency across life stages from lab-  
394 reared individuals provides further evidence for the simplicity of the lab environment. In  
395 contrast to the lab, the field-caught adults of *D. rubida* lacked congruence with the field-  
396 caught pupae. The parsimonious explanation is that the adults were caught from a different  
397 site to the other field samples but results from the focal field sites show that there is not much  
398 geographic variation in microbiome composition, so this is unlikely to explain the discrepancy.  
399 With adult flies we cannot rule out that they might have fed on a substance other than our  
400 yeasted banana bait. Given the influence of diet in *Drosophila* microbiome composition, it is  
401 clear that different food sources could explain microbiome incongruence. The substantial

402 differences in microbiomes between lab and field specimens suggests that future studies  
403 should be cautious in interpreting microbiome community composition from lab-kept  
404 specimens, particularly those from cultures maintained across multiple generations, as these  
405 are highly unlikely to be representative of natural microbiomes (Fig. S1) (Bost et al., 2018b;  
406 Dada et al., 2020). For example, we found that species-specificity was greater in lab-reared  
407 flies, but this result is likely a product of the heavily reduced microbiome richness in lab  
408 samples and not reflective of natural species-specific differences.

409

410 Previous studies on *Drosophila* have demonstrated high intra- and interspecific variation in  
411 microbiome community composition from wild-caught and lab-reared flies (Adair et al., 2018,  
412 2020; Bost et al., 2018b, 2018a; Solomon et al., 2019). We also found species-specific  
413 differences in microbiome composition amongst wild flies. Controlling for diet, in the field  
414 and especially in the lab, allowed us to recognise this species-specificity more accurately by  
415 eliminating dietary variation. In lab flies, there was significantly reduced microbiome richness,  
416 and every species maintained the same few bacterial genera. We found a significant effect of  
417 species identity (7% variation explained in the field; 29% in the lab) but it did not explain as  
418 much variation as the results from Adair et al., (2020) - who found species identity explained  
419 42% and 70% variation in two different sets of *Drosophila*. This discrepancy could be a product  
420 of the species themselves (i.e. in this study we used a different set of species) or the number  
421 of species studied (we studied four species here; Adair et al., (2020) studied eighteen), but  
422 the evidence from both studies suggests that species-specificity is maintained in the lab. It  
423 should be noted that other insect species have experienced dramatic microbiome shifts after  
424 being introduced to the lab (e.g. *Anopheles albimanus*; Dada et al., 2020). Since the four  
425 species we sampled are all frugivorous, sympatric *Drosophila* species, it is unlikely that

426 *Drosophila* diversification played much of a role in generating the microbiome differences we  
427 found here (especially because this study was not multi-generational).

428

429 The discrepancy in microbiome diversity found between lab and field flies suggests that  
430 *Drosophila* are not heavily reliant on a diverse bacterial microbiome, because a core group of  
431 specific bacterial taxa has not been consistently maintained between species or between  
432 environments. Hammer et al., (2019) raised compelling points about bacterial microbiome  
433 functionality and demonstrated multiple invertebrate species that appear to have no resident  
434 gut microbiome. In other insect species, host transmission of extracellular symbionts (like  
435 those in the gut) have been hypothesised to result in long-term associations between insect  
436 and microbe (Sanders et al., 2014; Kwong et al., 2017; Sinotte et al., 2020). The long-term  
437 laboratory survival of these four *Drosophila* species (minimum 24 generations) with radically  
438 different microbiome composition compared to the field suggests that they do not fit the  
439 hypothesis of long-term association between host and microbe, nor that their symbiotic  
440 relationship with bacteria is highly specialised (Leftwich et al., 2017). However, our findings  
441 from the lab partially corroborate those of Henriques et al., (2020) who found a dominant  
442 functional role for *Lactobacillus* and *Acetobacter* in lab-reared *Drosophila*. Specifically, the  
443 presence of *Lactobacillus* can stimulate *Acetobacter* to produce and excrete Isoleucine in  
444 *Drosophila* deprived of essential amino acids, suggesting that the high relative abundance of  
445 *Acetobacter* and *Lactobacillus* in our *Drosophila* species reflects a functioning microbiome  
446 (Henriques et al., 2020).

447

448 A crucial factor in this study was ensuring each field sample received the same food source,  
449 to control for diet as a factor influencing microbiome composition. By sampling pupae from

450 fermented banana baits in bottle traps hanging from branches we can guarantee that the  
451 pupae we sampled spent their life cycle from egg to pupa within a baited trap and thus only  
452 consumed the substances within their bottle trap, in turn providing some control over diet as  
453 a factor influencing their microbiomes. We believe this element of our study was crucial for  
454 recognising other deterministic factors of *Drosophila* microbiome community composition.  
455 Controlling for diet (a known influential factor on microbiome composition) in a study  
456 involving wild insects provides a useful option for investigating microbiome community  
457 assembly processes.

458

459 Overall, we found significant differences in the microbiomes of lab-reared and field-caught  
460 *Drosophila*, which were consistent across species and life stage. Species identity was also a  
461 significant variable in explaining microbiome community variation, in flies from the lab and  
462 the wild. We hypothesise that these differences are the products of environments with  
463 markedly different bacterial species pools. To elucidate functional conclusions from insect-  
464 microbiome analyses, more in-depth molecular analysis (e.g., metagenomics,  
465 transcriptomics) is required. We recommend that microbiome studies focus on wild-caught  
466 individuals and caution against determining microbiome composition from lab-only  
467 specimens. We advocate that future field studies are designed in a manner that controls for  
468 deterministic factors of microbiome composition, such as diet.

## 469 **Acknowledgements**

470 We thank H. Konvičková and J. Zima Jr. for their assistance in the molecular lab. We  
471 acknowledge funding support from the Czech Science Foundation grant no. 17-27184Y to JH.  
472 OTL was further supported by the UK National Environment Research Council  
473 (NE/N010221/1). Computational resources were supplied by the project "e-Infrastruktura CZ"  
474 (e-INFRA LM2018140) provided within the program Projects of Large Research, Development  
475 and Innovations Infrastructures. Fieldwork was conducted under permit WITK16977516 from  
476 Queensland's Department of Environment and Heritage Protection.

477

## 478 **References**

- 479 Adair, K. L., Bost, A., Bueno, E., Kaunisto, S., Kortet, R., Peters-Schulze, G., et al. (2020). Host  
480 determinants of among-species variation in microbiome composition in drosophilid  
481 flies. *ISME J.* 14, 217–229. doi:10.1038/s41396-019-0532-7.
- 482 Adair, K. L., Wilson, M., Bost, A., and Douglas, A. E. (2018). Microbial community assembly in  
483 wild populations of the fruit fly *Drosophila melanogaster*. *ISME J.*, 1.  
484 doi:10.1038/s41396-017-0020-x.
- 485 Amato, K. R., Yeoman, C. J., Kent, A., Righini, N., Carbonero, F., Estrada, A., et al. (2013).  
486 Habitat degradation impacts black howler monkey (*Alouatta pigra*) gastrointestinal  
487 microbiomes. *ISME J.* 7, 1344–1353. doi:10.1038/ismej.2013.16.
- 488 Andrews, S. (2010). *FASTQC. A quality control tool for high throughput sequence data.*  
489 Available at: <http://www.bioinformatics.babraham.ac.uk/projects/fastqc/>.

- 490 Bing, X., Gerlach, J., Loeb, G., and Buchon, N. (2018). Nutrient-dependent impact of  
491 microbes on *Drosophila suzukii* development. *mBio* 9. doi:10.1128/mBio.02199-17.
- 492 Blum, J. E., Fischer, C. N., Miles, J., and Handelsman, J. (2013). Frequent replenishment  
493 sustains the beneficial microbiome of *Drosophila melanogaster*. *mBio* 4, e00860-13.  
494 doi:10.1128/mBio.00860-13.
- 495 Bost, A., Franzenburg, S., Adair, K. L., Martinson, V. G., Loeb, G., and Douglas, A. E. (2018a).  
496 How gut transcriptional function of *Drosophila melanogaster* varies with the  
497 presence and composition of the gut microbiota. *Mol. Ecol.* 27, 1848–1859.  
498 doi:10.1111/mec.14413.
- 499 Bost, A., Martinson, V. G., Franzenburg, S., Adair, K. L., Albasi, A., Wells, M. T., et al. (2018b).  
500 Functional variation in the gut microbiome of wild *Drosophila* populations. *Mol. Ecol.*  
501 27, 2834–2845. doi:10.1111/mec.14728.
- 502 Brankatschk, M., Gutmann, T., Knittelfelder, O., Palladini, A., Prince, E., Grzybek, M., et al.  
503 (2018). A temperature-dependent switch in feeding preference improves *Drosophila*  
504 development and survival in the cold. *Dev. Cell* 46, 781-793.e4.  
505 doi:10.1016/j.devcel.2018.05.028.
- 506 Brown, J. J., Mihaljevic, J. R., Des Marteaux, L., and Hrček, J. (2020a). Metacommunity  
507 theory for transmission of heritable symbionts within insect communities. *Ecol. Evol.*  
508 10, 1703–1721. doi:10.1002/ece3.5754.
- 509 Brown, J. J., Rodríguez-Ruano, S. M., Poosakkannu, A., Batani, G., Schmidt, J. O., Roachell,  
510 W., et al. (2020b). Ontogeny, species identity, and environment dominate

- 511 microbiome dynamics in wild populations of kissing bugs (Triatominae). *Microbiome*  
512 8, 146. doi:10.1186/s40168-020-00921-x.
- 513 Camacho, C., Coulouris, G., Avagyan, V., Ma, N., Papadopoulos, J., Bealer, K., et al. (2009).  
514 BLAST+: architecture and applications. *BMC Bioinformatics* 10, 421.  
515 doi:10.1186/1471-2105-10-421.
- 516 Chandler, J. A., Lang, J. M., Bhatnagar, S., Eisen, J. A., and Kopp, A. (2011). Bacterial  
517 communities of diverse *Drosophila* species: ecological context of a host–microbe  
518 model system. *PLOS Genet.* 7, e1002272. doi:10.1371/journal.pgen.1002272.
- 519 Chaplinska, M., Gerritsma, S., Dini-Andreote, F., Salles, J. F., and Wertheim, B. (2016).  
520 Bacterial communities differ among *Drosophila melanogaster* populations and affect  
521 host resistance against parasitoids. *PLOS ONE* 11, e0167726.  
522 doi:10.1371/journal.pone.0167726.
- 523 Chrostek, E., Marialva, M. S. P., Esteves, S. S., Weinert, L. A., Martinez, J., Jiggins, F. M., et al.  
524 (2013). *Wolbachia* variants induce differential protection to viruses in *Drosophila*  
525 *melanogaster*: A phenotypic and phylogenomic analysis. *PLOS Genet.* 9, e1003896.  
526 doi:10.1371/journal.pgen.1003896.
- 527 Clayton, J. B., Vangay, P., Huang, H., Ward, T., Hillmann, B. M., Al-Ghalith, G. A., et al. (2016).  
528 Captivity humanizes the primate microbiome. *Proc. Natl. Acad. Sci.* 113, 10376–  
529 10381. doi:10.1073/pnas.1521835113.



- 530 Colman, D. R., Toolson, E. C., and Takacs-Vesbach, C. D. (2012). Do diet and taxonomy  
531 influence insect gut bacterial communities? *Mol. Ecol.* 21, 5124–5137.  
532 doi:10.1111/j.1365-294X.2012.05752.x.
- 533 Cooper, R. O., Vavra, J. M., and Cressler, C. E. (2021). Targeted manipulation of abundant  
534 and rare taxa in the *Daphnia magna* Microbiota with antibiotics impacts host fitness  
535 differentially. *mSystems* 6. doi:10.1128/mSystems.00916-20.
- 536 Corbin, C., Heyworth, E. R., Ferrari, J., and Hurst, G. D. D. (2017). Heritable symbionts in a  
537 world of varying temperature. *Heredity* 118, 10–20. doi:10.1038/hdy.2016.71.
- 538 Cornell, H. V., and Harrison, S. P. (2014). What are species pools and when are they  
539 important? *Annu. Rev. Ecol. Evol. Syst.* 45, 45–67. doi:10.1146/annurev-ecolsys-  
540 120213-091759.
- 541 Dada, N., Benedict, A. C., López, F., Lol, J. C., Sheth, M., Dzuris, N., et al. (2020). *Anopheles*  
542 *albimanus* natural microbiota is altered within one generation of laboratory  
543 colonization. *bioRxiv*, 2020.06.02.129619. doi:10.1101/2020.06.02.129619.
- 544 Davis, N. M., Proctor, D. M., Holmes, S. P., Relman, D. A., and Callahan, B. J. (2018). Simple  
545 statistical identification and removal of contaminant sequences in marker-gene and  
546 metagenomics data. *Microbiome* 6, 226. doi:10.1186/s40168-018-0605-2.
- 547 Douglas, A. E. (2016). How multi-partner endosymbioses function. *Nat. Rev. Microbiol.* 14,  
548 731–743. doi:10.1038/nrmicro.2016.151.
- 549 Economos, A. C., and Lints, F. A. (1984). Growth rate and life span in *Drosophila*. III. Effect of  
550 body size and development temperature on the biphasic relationship between

- 551 growth rate and life span. *Mech. Ageing Dev.* 27, 153–160. doi:10.1016/0047-
- 552 6374(84)90040-X.
- 553 Edgar, R. C. (2013). UPARSE: highly accurate OTU sequences from microbial amplicon reads.
- 554 *Nat. Methods* 10, 996–998. doi:10.1038/nmeth.2604.
- 555 Elgart, M., Stern, S., Salton, O., Gnainsky, Y., Heifetz, Y., and Soen, Y. (2016). Impact of gut
- 556 microbiota on the fly's germ line. *Nat. Commun.* 7. doi:10.1038/ncomms11280.
- 557 Fierer, N., and Jackson, R. B. (2006). The diversity and biogeography of soil bacterial
- 558 communities. *Proc. Natl. Acad. Sci.* 103, 626–631. doi:10.1073/pnas.0507535103.
- 559 Fierer, N., McCain, C. M., Meir, P., Zimmermann, M., Rapp, J. M., Silman, M. R., et al. (2011).
- 560 Microbes do not follow the elevational diversity patterns of plants and animals.
- 561 *Ecology* 92, 797–804. doi:10.1890/10-1170.1.
- 562 Hamilton, P. T., and Perlman, S. J. (2013). Host defense via symbiosis in *Drosophila*. *PLOS*
- 563 *Pathog.* 9, e1003808. doi:10.1371/journal.ppat.1003808.
- 564 Hammer, T. J., McMillan, W. O., and Fierer, N. (2014). Metamorphosis of a butterfly-
- 565 associated bacterial community. *PLOS ONE* 9, e86995.
- 566 doi:10.1371/journal.pone.0086995.
- 567 Hammer, T. J., and Moran, N. A. (2019). Links between metamorphosis and symbiosis in
- 568 holometabolous insects. *Philos. Trans. R. Soc. B Biol. Sci.* 374, 20190068.
- 569 doi:10.1098/rstb.2019.0068.
- 570 Hammer, T. J., Sanders, J. G., and Fierer, N. (2019). Not all animals need a microbiome.
- 571 *FEMS Microbiol. Lett.* 366. doi:10.1093/femsle/fnz117.

- 572 Haselkorn, T. S., Cockburn, S. N., Hamilton, P. T., Perlman, S. J., and Jaenike, J. (2013).  
573 Infectious adaptation: potential host range of a defensive endosymbiont in  
574 *Drosophila*. *Evolution* 67, 934–945. doi:10.1111/evo.12020.
- 575 Hegde, S., Khanipov, K., Albayrak, L., Golovko, G., Pimenova, M., Saldaña, M. A., et al.  
576 (2018). Microbiome interaction networks and community structure from laboratory-  
577 reared and field-collected *Aedes aegypti*, *Aedes albopictus*, and *Culex*  
578 *quinquefasciatus* mosquito vectors. *Front. Microbiol.* 9.  
579 doi:10.3389/fmicb.2018.02160.
- 580 Henriques, S. F., Dhakan, D. B., Serra, L., Francisco, A. P., Carvalho-Santos, Z., Baltazar, C., et  
581 al. (2020). Metabolic cross-feeding in imbalanced diets allows gut microbes to  
582 improve reproduction and alter host behaviour. *Nat. Commun.* 11, 4236.  
583 doi:10.1038/s41467-020-18049-9.
- 584 Henry, Y., and Colinet, H. (2018). Microbiota disruption leads to reduced cold tolerance in  
585 *Drosophila* flies. *Sci. Nat.* 105, 59. doi:10.1007/s00114-018-1584-7.
- 586 James, A. C., Azevedo, R. B. R., and Partridge, L. (1997). Genetic and environmental  
587 responses to temperature of *Drosophila melanogaster* from a latitudinal cline.  
588 *Genetics* 146, 881–890.
- 589 Jeffs, C. T., Terry, J. C. D., Higgie, M., Jandová, A., Konvičková, H., Brown, J. J., et al. (2021).  
590 Molecular analyses reveal consistent food web structure with elevation in rainforest  
591 *Drosophila* – parasitoid communities. *Ecography* 44, 403–413.  
592 doi:<https://doi.org/10.1111/ecog.05390>.

- 593 Kinjo, H., Kunimi, Y., and Nakai, M. (2014). Effects of temperature on the reproduction and  
594 development of *Drosophila suzukii* (Diptera: Drosophilidae). *Appl. Entomol. Zool.* 49,  
595 297–304. doi:10.1007/s13355-014-0249-z.
- 596 Kohl, K. D. (2020). Ecological and evolutionary mechanisms underlying patterns of  
597 phyllosymbiosis in host-associated microbial communities. *Philos. Trans. R. Soc. B*  
598 *Biol. Sci.* 375, 20190251. doi:10.1098/rstb.2019.0251.
- 599 Kohl, K. D., Skopec, M. M., and Dearing, M. D. (2014). Captivity results in disparate loss of  
600 gut microbial diversity in closely related hosts. *Conserv. Physiol.* 2.  
601 doi:10.1093/conphys/cou009.
- 602 Kwong, W. K., Medina, L. A., Koch, H., Sing, K.-W., Soh, E. J. Y., Ascher, J. S., et al. (2017).  
603 Dynamic microbiome evolution in social bees. *Sci. Adv.* 3, e1600513.  
604 doi:10.1126/sciadv.1600513.
- 605 Lauber, C. L., Hamady, M., Knight, R., and Fierer, N. (2009). Pyrosequencing-based  
606 assessment of soil pH as a predictor of soil bacterial community structure at the  
607 continental scale. *Appl. Environ. Microbiol.* 75, 5111–5120. doi:10.1128/AEM.00335-  
608 09.
- 609 Leftwich, P. T., Clarke, N. V. E., Hutchings, M. I., and Chapman, T. (2017). Gut microbiomes  
610 and reproductive isolation in *Drosophila*. *Proc. Natl. Acad. Sci.* 114, 12767–12772.
- 611 Lizé, A., McKay, R., and Lewis, Z. (2014). Kin recognition in *Drosophila*: the importance of  
612 ecology and gut microbiota. *ISME J.* 8, 469–477. doi:10.1038/ismej.2013.157.

- 613 Martinson, V. G., Carpinteyro-Ponce, J., Moran, N. A., and Markow, T. A. (2017). A distinctive  
614 and host-restricted gut microbiota in populations of a cactophilic *Drosophila* species.  
615 *Appl. Environ. Microbiol.* 83. doi:10.1128/AEM.01551-17.
- 616 McLean, A. H. C., Parker, B. J., Hrček, J., Henry, L. M., and Godfray, H. C. J. (2016). Insect  
617 symbionts in food webs. *Phil Trans R Soc B* 371, 20150325.  
618 doi:10.1098/rstb.2015.0325.
- 619 McMurdie, P. J., and Holmes, S. (2013). phyloseq: An R package for reproducible interactive  
620 analysis and graphics of microbiome census data. *PLOS ONE* 8, e61217.  
621 doi:10.1371/journal.pone.0061217.
- 622 Meyer, K. M., Memiaghe, H., Korte, L., Kenfack, D., Alonso, A., and Bohannan, B. J. M.  
623 (2018). Why do microbes exhibit weak biogeographic patterns? *ISME J.* 12, 1404–  
624 1413. doi:10.1038/s41396-018-0103-3.
- 625 Morrow, J. L., Frommer, M., Shearman, D. C. A., and Riegler, M. (2015). The microbiome of  
626 field-caught and laboratory-adapted Australian tephritid fruit fly species with  
627 different host plant use and specialisation. *Microb. Ecol.* 70, 498–508.  
628 doi:10.1007/s00248-015-0571-1.
- 629 Nelson, T. M., Rogers, T. L., Carlini, A. R., and Brown, M. V. (2013). Diet and phylogeny shape  
630 the gut microbiota of Antarctic seals: a comparison of wild and captive animals.  
631 *Environ. Microbiol.* 15, 1132–1145. doi:<https://doi.org/10.1111/1462-2920.12022>.
- 632 Nottingham, A. T., Whitaker, J., Ostle, N. J., Bardgett, R. D., McNamara, N. P., Fierer, N., et  
633 al. (2019). Microbial responses to warming enhance soil carbon loss following

- 634 translocation across a tropical forest elevation gradient. *Ecol. Lett.* 22, 1889–1899.  
635 doi:10.1111/ele.13379.
- 636 Nováková, E., Woodhams, D. C., Rodríguez-Ruano, S. M., Brucker, R. M., Leff, J. W., Maharaj,  
637 A., et al. (2017). Mosquito microbiome dynamics, a background for prevalence and  
638 seasonality of West Nile virus. *Front. Microbiol.* 8, 526.  
639 doi:10.3389/fmicb.2017.00526.
- 640 Oksanen, J., Blanchet, F. G., Friendly, M., Kindt, R., Legendre, P., McGlenn, D., et al. (2019).  
641 *vegan: Community Ecology Package*. Available at: [https://CRAN.R-](https://CRAN.R-project.org/package=vegan)  
642 [project.org/package=vegan](https://CRAN.R-project.org/package=vegan).
- 643 Park, R., Dzialo, M. C., Spaepen, S., Nsabimana, D., Gielens, K., Devriese, H., et al. (2019).  
644 Microbial communities of the house fly *Musca domestica* vary with geographical  
645 location and habitat. *Microbiome* 7, 147. doi:10.1186/s40168-019-0748-9.
- 646 Pärtel, M., Bennett, J. A., and Zobel, M. (2016). Macroecology of biodiversity: disentangling  
647 local and regional effects. *New Phytol.* 211, 404–410. doi:10.1111/nph.13943.
- 648 Pettersson, M., and Bååth, E. (2003). Temperature-dependent changes in the soil bacterial  
649 community in limed and unlimed soil. *FEMS Microbiol. Ecol.* 45, 13–21.  
650 doi:10.1016/S0168-6496(03)00106-5.
- 651 Quast, C., Pruesse, E., Yilmaz, P., Gerken, J., Schweer, T., Yarza, P., et al. (2013). The SILVA  
652 ribosomal RNA gene database project: improved data processing and web-based  
653 tools. *Nucleic Acids Res.* 41, D590–D596. doi:10.1093/nar/gks1219.

- 654 R Core Team (2019). *R: A language and environment for statistical computing*. Vienna,  
655 Austria Available at: <https://www.R-project.org/>.
- 656 Ratkowsky, D. A., Olley, J., McMeekin, T. A., and Ball, A. (1982). Relationship between  
657 temperature and growth rate of bacterial cultures. *J. Bacteriol.* 149, 1–5.
- 658 Rodríguez-Ruano, S. M., Škočková, V., Rego, R. O. M., Schmidt, J. O., Roachell, W., Hypša, V.,  
659 et al. (2018). Microbiomes of North American Triatominae: the grounds for Chagas  
660 disease epidemiology. *Front. Microbiol.* 9, 1167. doi:10.3389/fmicb.2018.01167.
- 661 Sanders, J. G., Powell, S., Kronauer, D. J. C., Vasconcelos, H. L., Frederickson, M. E., and  
662 Pierce, N. E. (2014). Stability and phylogenetic correlation in gut microbiota: lessons  
663 from ants and apes. *Mol. Ecol.* 23, 1268–1283. doi:10.1111/mec.12611.
- 664 Sansone, C. L., Cohen, J., Yasunaga, A., Xu, J., Osborn, G., Subramanian, H., et al. (2015).  
665 Microbiota-dependent priming of antiviral intestinal immunity in *Drosophila*. *Cell*  
666 *Host Microbe* 18, 571–581. doi:10.1016/j.chom.2015.10.010.
- 667 Shen, C., Ni, Y., Liang, W., Wang, J., and Chu, H. (2015). Distinct soil bacterial communities  
668 along a small-scale elevational gradient in alpine tundra. *Front. Microbiol.* 6.  
669 doi:10.3389/fmicb.2015.00582.
- 670 Siles, J. A., and Margesin, R. (2016). Abundance and diversity of bacterial, archaeal, and  
671 fungal communities along an altitudinal gradient in alpine forest soils: what are the  
672 driving factors? *Microb. Ecol.* 72, 207–220. doi:10.1007/s00248-016-0748-2.

- 673 Sinotte, V. M., Renelies-Hamilton, J., Taylor, B. A., Ellegaard, K. M., Sapountzis, P., Vasseur-  
674 Cagnet, M., et al. (2020). Synergies between division of labor and gut microbiomes  
675 of social insects. *Front. Ecol. Evol.* 7. doi:10.3389/fevo.2019.00503.
- 676 Solomon, G. M., Dodangoda, H., McCarthy-Walker, T., Ntim-Gyakari, R., and Newell, P. D.  
677 (2019). The microbiota of *Drosophila suzukii* influences the larval development of  
678 *Drosophila melanogaster*. *PeerJ* 7, e8097. doi:10.7717/peerj.8097.
- 679 Staubach, F., Baines, J. F., Künzel, S., Bik, E. M., and Petrov, D. A. (2013). Host species and  
680 environmental effects on bacterial communities associated with *Drosophila* in the  
681 laboratory and in the natural environment. *PLoS ONE* 8.  
682 doi:10.1371/journal.pone.0070749.
- 683 Staudacher, H., Kaltenpoth, M., Breeuwer, J. A. J., Menken, S. B. J., Heckel, D. G., and Groot,  
684 A. T. (2016). Variability of bacterial communities in the moth *Heliothis virescens*  
685 indicates transient association with the host. *PLOS ONE* 11, e0154514.  
686 doi:10.1371/journal.pone.0154514.
- 687 Thompson, L. R., Sanders, J. G., McDonald, D., Amir, A., Ladau, J., Locey, K. J., et al. (2017). A  
688 communal catalogue reveals Earth's multiscale microbial diversity. *Nature* 551, 457–  
689 463. doi:10.1038/nature24621.
- 690 Tochen, S., Dalton, D. T., Wiman, N., Hamm, C., Shearer, P. W., and Walton, V. M. (2014).  
691 Temperature-related development and population parameters for *Drosophila suzukii*  
692 (Diptera: Drosophilidae) on cherry and blueberry. *Environ. Entomol.* 43, 501–510.  
693 doi:10.1603/EN13200.



- 694 Tsuji, S., Ushio, M., Sakurai, S., Minamoto, T., and Yamanaka, H. (2017). Water temperature-  
695 dependent degradation of environmental DNA and its relation to bacterial  
696 abundance. *PLoS ONE* 12. doi:10.1371/journal.pone.0176608.
- 697 Wadgyamar, S. M., Mactavish, R. M., and Anderson, J. T. (2018). Transgenerational and  
698 within-generation plasticity in response to climate change: insights from a  
699 manipulative field experiment across an elevational gradient. *Am. Nat.* 192, 698–  
700 714. doi:10.1086/700097.
- 701 Wang, J., Soininen, J., Zhang, Y., Wang, B., Yang, X., and Shen, J. (2011). Contrasting patterns  
702 in elevational diversity between microorganisms and macroorganisms. *J. Biogeogr.*  
703 38, 595–603. doi:10.1111/j.1365-2699.2010.02423.x.
- 704 Wong, A. C.-N., Chaston, J. M., and Douglas, A. E. (2013). The inconstant gut microbiota of  
705 *Drosophila* species revealed by 16S rRNA gene analysis. *ISME J.* 7, 1922–1932.  
706 doi:10.1038/ismej.2013.86.
- 707 Woodhams, D. C., Bletz, M. C., Becker, C. G., Bender, H. A., Buitrago-Rosas, D., Diebboll, H.,  
708 et al. (2020). Host-associated microbiomes are predicted by immune system  
709 complexity and climate. *Genome Biol.* 21, 23. doi:10.1186/s13059-019-1908-8.
- 710 Xie, J., Butler, S., Sanchez, G., and Mateos, M. (2014). Male killing *Spiroplasma* protects  
711 *Drosophila melanogaster* against two parasitoid wasps. *Heredity* 112, 399–408.  
712 doi:10.1038/hdy.2013.118.

- 713 Xie, J., Winter, C., Winter, L., and Mateos, M. (2015). Rapid spread of the defensive  
714 endosymbiont *Spiroplasma* in *Drosophila hydei* under high parasitoid wasp pressure.  
715 *FEMS Microbiol. Ecol.* 91, 1–11. doi:10.1093/femsec/fiu017.
- 716 Yadav, S., Frazer, J., Banga, A., Pruitt, K., Harsh, S., Jaenike, J., et al. (2018). Endosymbiont-  
717 based immunity in *Drosophila melanogaster* against parasitic nematode infection.  
718 *PLOS ONE* 13, e0192183. doi:10.1371/journal.pone.0192183.
- 719 Yun, J.-H., Roh, S. W., Whon, T. W., Jung, M.-J., Kim, M.-S., Park, D.-S., et al. (2014). Insect  
720 gut bacterial diversity determined by environmental habitat, diet, developmental  
721 stage, and phylogeny of host. *Appl Env. Microbiol* 80, 5254–5264.  
722 doi:10.1128/AEM.01226-14.
- 723
- 724

**Table 1: Breakdown of the sample set used in this study. PL = Paluma Low, PH = Paluma High, KL = Kirrama Low, KH = Kirrama High, JCU = James Cook University campus.**

| Species                   | Stage | Origin | Sites          | Number of samples |
|---------------------------|-------|--------|----------------|-------------------|
| <i>D. rubida</i>          | pupae | field  | PL, PH, KL, KH | 79                |
| <i>D. rubida</i>          | adult | field  | JCU            | 14                |
| <i>D. pseudoananassae</i> | pupae | field  | PL, PH, KL, KH | 48                |
| <i>D. pallidifrons</i>    | pupae | field  | PL, PH, KL, KH | 39                |
| <i>D. sulfurigaster</i>   | pupae | field  | PL, PH, KL, KH | 10                |
| <i>D. rubida</i>          | pupae | lab    | PL, PH, KL, KH | 20                |
| <i>D. rubida</i>          | adult | lab    | PL, PH, KL, KH | 20                |
| <i>D. pseudoananassae</i> | pupae | lab    | PL, KL, KH     | 20                |
| <i>D. pseudoananassae</i> | adult | lab    | PL, KL, KH     | 20                |
| <i>D. pallidifrons</i>    | pupae | lab    | PH, KH         | 10                |
| <i>D. pallidifrons</i>    | adult | lab    | PH, KH         | 10                |
| <i>D. sulfurigaster</i>   | pupae | lab    | PL, PH, KL, KH | 20                |
| <i>D. sulfurigaster</i>   | adult | lab    | PL, PH, KL, KH | 20                |
| banana bait               | na    | field  | PL, PH, JCU    | 20                |
| lab fly food              | na    | lab    | na             | 10                |

725

726

727

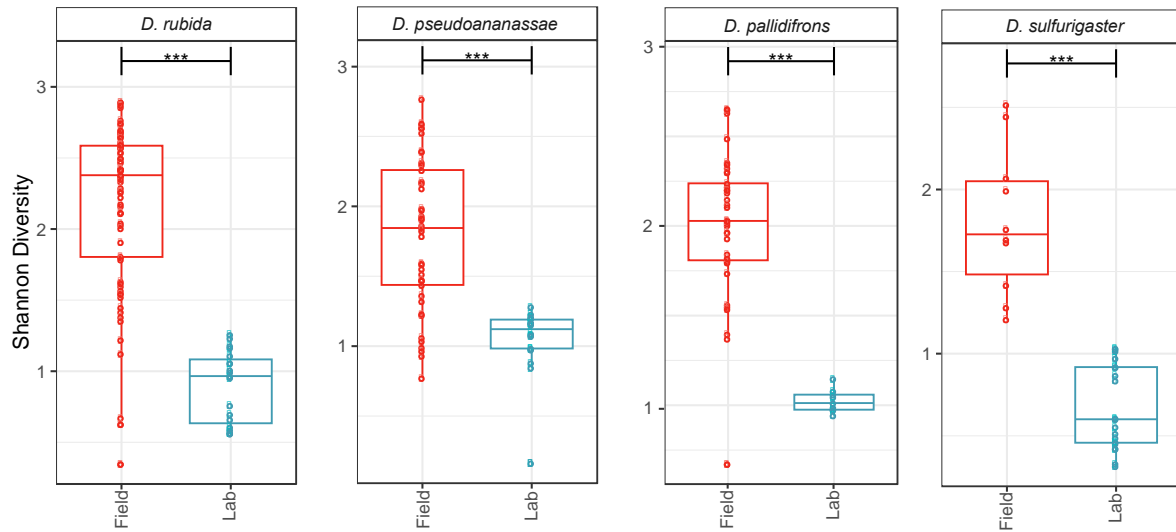

729 **Figure 1: Comparison of Shannon index values for pupal samples from each species of**  
730 ***Drosophila* in the lab and the field. A) = *D. rubida*, B) = *D. pseudoananassae*, C) = *D.***  
731 ***pallidifrons*, D) = *D. sulfurigaster*. Field samples are shown in red; lab samples are shown in**  
732 **blue. Three asterisk (\*\*\*) denotes highly significant result ( $p \leq 0.001$ ).**

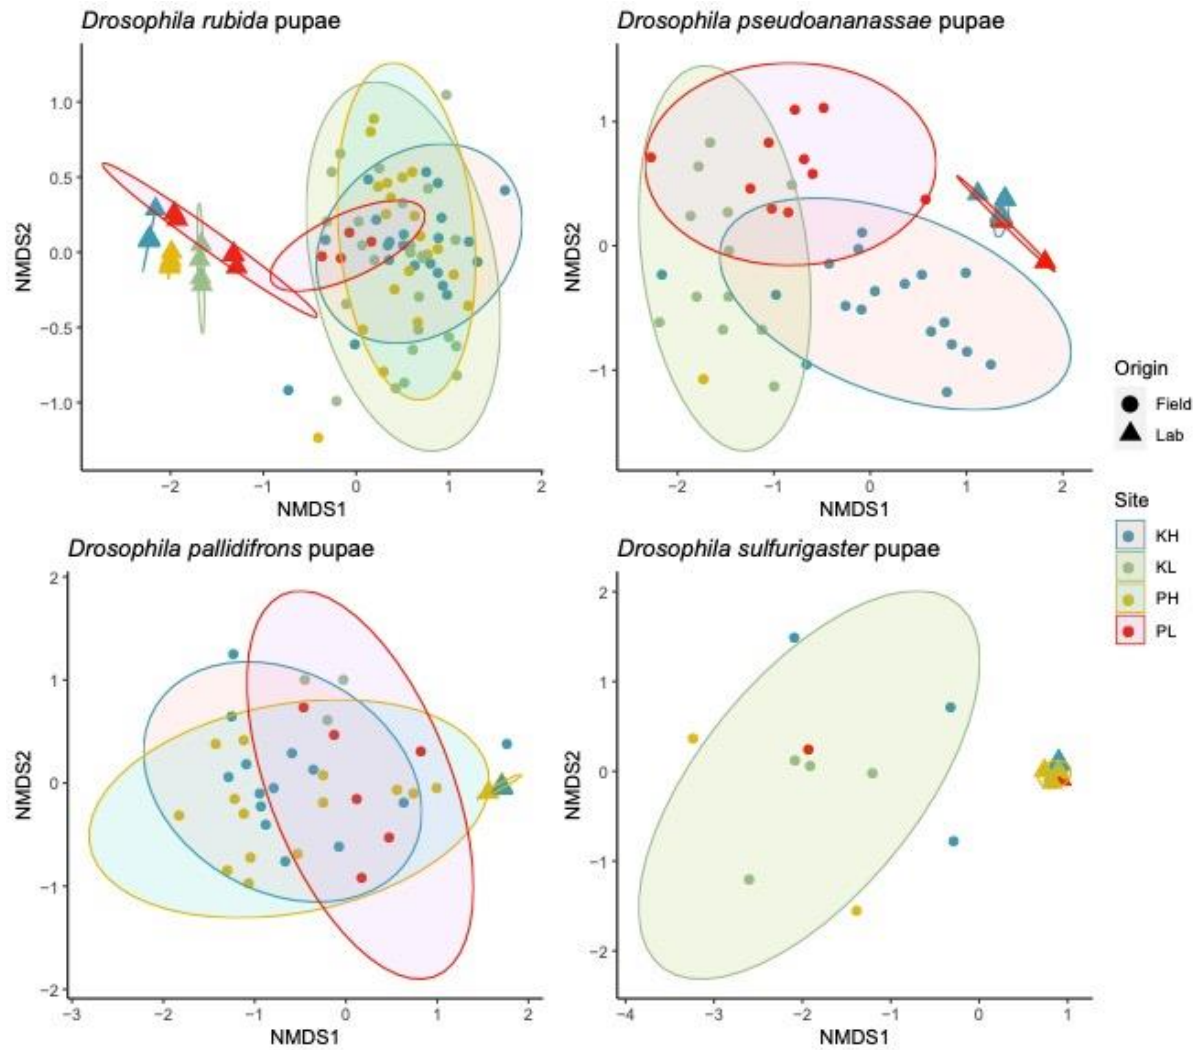

733

734 **Figure 2: NMDS analysis of microbiome communities from pupae samples of *Drosophila***

735 ***rubida*, *D. pseudoananassae*, *D. pallidifrons*, and *D. sulfurigaster* in the lab (triangles) and**

736 **the field (circles). Ellipses are significant at 0.05 confidence interval. Colours represent each**

737 **field site, so for lab samples represent site of origin.**

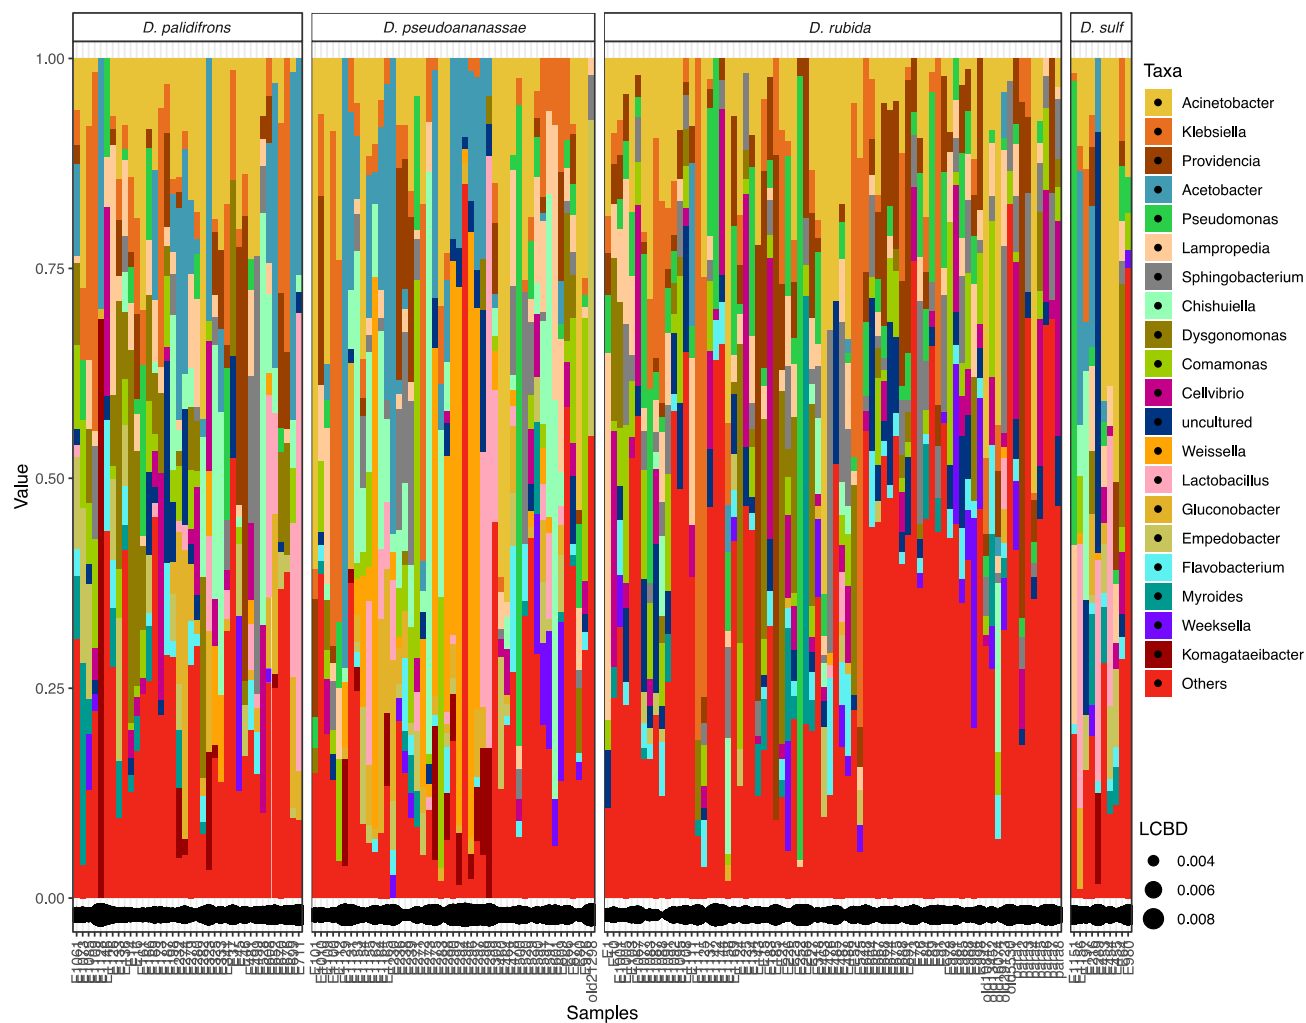

738

739 **Figure 3: The top 20 bacterial genera for field-reared pupal samples of all four *Drosophila***

740 **species. Each individual column represents an individual sample. Relative abundance is on**

741 **the y axis. LCBD = Local Contribution to Beta Diversity.**
